# Supplementary material
Source: publisher site journal article supplement (https://www.spandidos-publications.com/3229/downloadSupplementary)

Figure S1. Proof of transfection of miR-1343-3p inhibitor and sh-NFIX in NSCLC cells (A459 and H1299 cells) was determined via RT-qPCR. (A) The transfection efficiency of miR-1343-3p inhibitors was detected via RT-qPCR. \*\*\* $P < 0.005$  vs. inhibitors NC. (B) The transfection efficiency of sh-NFIX was detected via RT-qPCR. \*\*\* $P < 0.005$  vs. sh-NC. sh, short hairpin RNA; miR, microRNA; NFIX, nuclear factor IX; RT-qPCR, reverse transcription-quantitative PCR; NC, negative control.

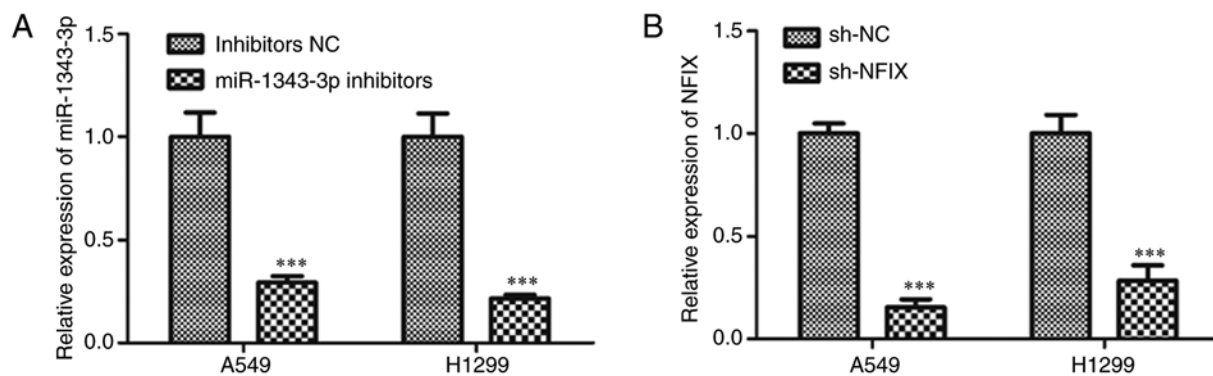

Supplement: Supplementary file 1 [file downloadSupplementary]
